# Supplementary material for: MSBooster: improving peptide identification rates using deep learning-based features
Source: PubMed Central journal article supplement (PMC10374903; doi:10.1038/s41467-023-40129-9), 2023-07-27
Supplement: 41467_2023_40129_MOESM4_ESM.pdf [file 41467_2023_40129_MOESM4_ESM.pdf]

## **Description of Additional Supplementary Files**

### **File Name: Supplementary Data 1**

Description: Statistics for identified peptides/proteins when using different MSBooster features

### **File Name: Supplementary Data 2**

Description: Reported canonical and non-canonical HLA peptides for Mel15 patient
